# Supplementary material
Source: ML conference proceedings conference paper supplement (https://proceedings.mlr.press/v84/chen18f.html)
Supplement: Supplementary file [file chen18f-supp.pdf]

## Appendix A Proof of Theorem 1

Before presenting the proof of Theorem 1, we need two lemmas first. Lemma 1 shows that a  $\beta$ -smooth function can be bounded by quadratic functions from above and below. Lemma 2 shows the concavity of continuous DR-submodular functions along non-negative and non-positive directions.

**Lemma 1.** *If  $f$  is  $\beta$ -smooth, then we have for any  $\mathbf{x}$  and  $\mathbf{y}$ ,*

$$|f(\mathbf{x}) - f(\mathbf{y}) - \nabla f(\mathbf{x})^\top (\mathbf{x} - \mathbf{y})| \leq \frac{\beta}{2} \|\mathbf{x} - \mathbf{y}\|^2.$$

$$|f(\mathbf{x}) - f(\mathbf{y}) - \nabla f(\mathbf{y})^\top (\mathbf{x} - \mathbf{y})| \leq \frac{\beta}{2} \|\mathbf{x} - \mathbf{y}\|^2.$$

*Proof.* Let us define an auxiliary function  $g(t) = f(\mathbf{x} + t(\mathbf{y} - \mathbf{x}))$ . We observe that  $g(0) = f(\mathbf{x})$  and  $g(1) = f(\mathbf{y})$ . The derivative of  $g(t)$  is

$$g'(t) = \nabla f(\mathbf{x} + t(\mathbf{y} - \mathbf{x}))^\top (\mathbf{y} - \mathbf{x}).$$

We have

$$f(\mathbf{y}) - f(\mathbf{x}) = g(1) - g(0) = \int_0^1 g'(t) dt = \int_0^1 \nabla f(\mathbf{x} + t(\mathbf{y} - \mathbf{x}))^\top (\mathbf{y} - \mathbf{x}) dt.$$

The left-hand side of the first inequality is equal to

$$\begin{aligned} & \left| \int_0^1 \nabla f(\mathbf{x} + t(\mathbf{y} - \mathbf{x}))^\top (\mathbf{x} - \mathbf{y}) dt - \nabla f(\mathbf{x})^\top (\mathbf{x} - \mathbf{y}) \right| \\ &= \left| \int_0^1 (\nabla f(\mathbf{x} + t(\mathbf{y} - \mathbf{x})) - \nabla f(\mathbf{x}))^\top (\mathbf{x} - \mathbf{y}) dt \right| \\ &\leq \int_0^1 |(\nabla f(\mathbf{x} + t(\mathbf{y} - \mathbf{x})) - \nabla f(\mathbf{x}))^\top (\mathbf{x} - \mathbf{y})| dt \\ &\leq \int_0^1 \|\nabla f(\mathbf{x} + t(\mathbf{y} - \mathbf{x})) - \nabla f(\mathbf{x})\| \|\mathbf{x} - \mathbf{y}\| dt \\ &\leq \int_0^1 \beta t \|\mathbf{x} - \mathbf{y}\|^2 dt \\ &= \frac{\beta}{2} \|\mathbf{x} - \mathbf{y}\|^2. \end{aligned}$$

Exchanging  $\mathbf{x}$  and  $\mathbf{y}$  in the first inequality, we obtain the second one immediately.  $\square$

**Lemma 2** (Proposition 4 in Bian et al. (2017)). *A continuous DR-submodular function is concave along any non-negative direction and any non-positive direction.*

Lemma 2 implies that if  $f$  is continuous DR-submodular, fixing any  $x$  in its domain,  $g(z) \triangleq f(\mathbf{x} + z\mathbf{v})$  is concave in  $z$  as long as  $\mathbf{v} \geq 0$  holds elementwise. Now we present the proof of Theorem 1.

*Proof.* As the first step, let us fix  $t$  and  $k$ . Since  $f_t$  is  $\beta$ -smooth, by Lemma 1, for any  $\xi \geq 0$  and  $\mathbf{x}, \mathbf{v} \in \mathbb{R}_{\geq 0}^n$ , we have

$$f_t(\mathbf{x} + \xi\mathbf{v}) - f_t(\mathbf{x}) - \nabla f_t(\mathbf{x})^\top (\xi\mathbf{v}) \geq -\frac{\beta}{2} \|\xi\mathbf{v}\|^2$$

Let  $L \triangleq \beta R^2$ . We deduce

$$f_t(\mathbf{x}_t(k+1)) - f_t(\mathbf{x}_t(k)) = f_t(\mathbf{x}_t(k) + \frac{1}{K}\mathbf{v}_t^k) - f_t(\mathbf{x}_t(k)) \geq \frac{1}{K} \langle \mathbf{v}_t^k, \nabla f_t(\mathbf{x}_t(k)) \rangle - \frac{L}{2K^2}.$$

We sum the above equation over  $t$  and obtain

$$\sum_{t=1}^T f_t(\mathbf{x}_t(k+1)) - f_t(\mathbf{x}_t(k)) \geq \sum_{t=1}^T \frac{1}{K} \langle \mathbf{v}_t^k, \nabla f_t(\mathbf{x}_t(k)) \rangle - \frac{LT}{2K^2}.$$

The RFTL algorithm instance  $\mathcal{E}^k$  finds  $\{\mathbf{v}_t^k : 1 \leq t \leq T\}$  such that

$$\sum_{t=1}^T \langle \mathbf{v}^{k*}, \nabla f_t(\mathbf{x}_t(k)) \rangle - \sum_{t=1}^T \langle \mathbf{v}_t^k, \nabla f_t(\mathbf{x}_t(k)) \rangle \leq r^k \leq 2DG\sqrt{T},$$

where

$$\mathbf{v}^{k*} = \arg \max_{\mathbf{v} \in \mathcal{P}} \sum_{t=1}^T \langle \mathbf{v}, \nabla f_t(\mathbf{x}_t(k)) \rangle$$

and  $r^k$  is the total regret that the RFTL instance suffers by the end of the  $T$ th iteration. According to the regret bound of the RFTL, we know that  $r^k \leq 2DG\sqrt{T}$ . Therefore,

$$\sum_{t=1}^T f_t(\mathbf{x}_t(k+1)) - f_t(\mathbf{x}_t(k)) \geq \frac{1}{K} \left( \sum_{t=1}^T \langle \mathbf{v}^{k*}, \nabla f_t(\mathbf{x}_t(k)) \rangle - r^k \right) - \frac{LT}{2K^2}.$$

We define  $\mathbf{x}^* \triangleq \arg \max_{\mathbf{v} \in \mathcal{P}} \sum_{t=1}^T f_t(\mathbf{v})$  and  $\mathbf{w}_t^k = (\mathbf{x}^* - \mathbf{x}_t(k)) \vee 0$ . For every  $t$ , we have  $\mathbf{w}_t^k = (\mathbf{x}^* - \mathbf{x}_t(k)) \vee 0 \leq \mathbf{x}^*$ . It is obvious that  $\mathbf{w}_t^k \geq 0$ . Therefore we deduce that  $\mathbf{w}_t^k \in \mathcal{X}$ . Due to the concavity of  $f_t$  along any non-negative direction (see Lemma 2), we have

$$f_t(\mathbf{x}_t(k) + \mathbf{w}_t^k) - f_t(\mathbf{x}_t(k)) \leq \langle \mathbf{w}_t^k, \nabla f_t(\mathbf{x}_t(k)) \rangle.$$

In light of the above equation, we obtain a lower bound for  $\sum_{t=1}^T \langle \mathbf{v}^{k*}, \nabla f_t(\mathbf{x}_t(k)) \rangle$ :

$$\begin{aligned} \sum_{t=1}^T \langle \mathbf{v}^{k*}, \nabla f_t(\mathbf{x}_t(k)) \rangle &\geq \sum_{t=1}^T \langle \mathbf{x}^*, \nabla f_t(\mathbf{x}_t(k)) \rangle \\ &\stackrel{(a)}{\geq} \sum_{t=1}^T \langle \mathbf{w}_t^k, \nabla f_t(\mathbf{x}_t(k)) \rangle \\ &\geq \sum_{t=1}^T (f_t(\mathbf{x}_t(k) + \mathbf{w}_t^k) - f_t(\mathbf{x}_t(k))) \\ &= \sum_{t=1}^T (f_t(\mathbf{x}^* \vee \mathbf{x}_t(k)) - f_t(\mathbf{x}_t(k))) \\ &\geq \sum_{t=1}^T (f_t(\mathbf{x}^*) - f_t(\mathbf{x}_t(k))). \end{aligned}$$

We use the fact that  $\nabla f_t(\mathbf{x}_t(k)) \geq 0$  and  $\mathbf{x}^* \geq \mathbf{w}_t^k$  entrywise in the inequality (a).

$$\sum_{t=1}^T f_t(\mathbf{x}_t(k+1)) - f_t(\mathbf{x}_t(k)) \geq \frac{1}{K} \left( \sum_{t=1}^T (f_t(\mathbf{x}^*) - f_t(\mathbf{x}_t(k))) - r^k \right) - \frac{LT}{2K^2}.$$

After rearrangement,

$$\sum_{t=1}^T (f_t(\mathbf{x}_t(k+1)) - f_t(\mathbf{x}^*)) \geq \left(1 - \frac{1}{K}\right) \sum_{t=1}^T (f_t(\mathbf{x}_t(k)) - f_t(\mathbf{x}^*)) - \frac{1}{K} r^k - \frac{LT}{2K^2}.$$

Therefore,

$$\begin{aligned} \sum_{t=1}^T (f_t(\mathbf{x}_t(K)) - f_t(\mathbf{x}^*)) &\geq (1 - \frac{1}{K})^K \sum_{t=1}^T (f_t(\mathbf{x}_t(0)) - f_t(\mathbf{x}^*)) - \frac{1}{K} \sum_{k=0}^{K-1} r^k - \frac{LT}{2K} \\ &= (1 - \frac{1}{K})^K \sum_{t=1}^T (f_t(0) - f_t(\mathbf{x}^*)) - \frac{1}{K} \sum_{k=0}^{K-1} r^k - \frac{LT}{2K}. \end{aligned}$$

Since  $(1 - \frac{1}{K})^K \leq e^{-1}$ , we have

$$\begin{aligned} \sum_{t=1}^T (f_t(\mathbf{x}^*) - f_t(\mathbf{x}_t(K))) &\leq (1 - \frac{1}{K})^K \sum_{t=1}^T (f_t(\mathbf{x}^*) - f_t(0)) + \frac{1}{K} \sum_{k=0}^{K-1} r^k + \frac{LT}{2K} \\ &\leq e^{-1} \sum_{t=1}^T (f_t(\mathbf{x}^*) - f_t(0)) + \frac{1}{K} \sum_{k=0}^{K-1} r^k + \frac{LT}{2K}. \end{aligned}$$

After rearrangement, we have

$$\sum_{t=1}^T f_t(\mathbf{x}_t(K)) \geq (1 - 1/e) \sum_{t=1}^T f_t(\mathbf{x}^*) + e^{-1} \sum_{t=1}^T f_t(0) - \frac{1}{K} \sum_{k=0}^{K-1} r^k - \frac{LT}{2K^2}.$$

Plugging in the definition of  $r^k$  gives

$$\sum_{t=1}^T f_t(\mathbf{x}_t) = \sum_{t=1}^T f_t(\mathbf{x}_t(K)) \geq (1 - 1/e) \sum_{t=1}^T f_t(\mathbf{x}^*) + e^{-1} \sum_{t=1}^T f_t(0) - 2DG\sqrt{T} - \frac{LT}{2K}.$$

Recall that  $\mathbf{x}_t(K)$  is exactly  $\mathbf{x}_t$ . Thus equivalently, we have

$$(1 - 1/e) \sum_{t=1}^T f_t(\mathbf{x}^*) - \sum_{t=1}^T f_t(\mathbf{x}_t) \leq -e^{-1} \sum_{t=1}^T f_t(0) + 2DG\sqrt{T} + \frac{\beta R^2 T}{2K}.$$

□

## Appendix B Proof of Theorem 2

### B.1 Gradient Ascent Case

The theoretical guarantee of gradient ascent methods applied to concave functions relies on a pivotal property that characterizes concavity: if  $F$  is concave, then  $F(\mathbf{y}) - F(\mathbf{x}) \leq \langle \nabla F(\mathbf{x}), \mathbf{y} - \mathbf{x} \rangle$ . Fortunately, there is a similar property that holds for monotone weakly DR-submodular functions, which is presented in Lemma 3.

**Lemma 3.** *Let  $F : \mathcal{X} \rightarrow \mathbb{R}_+$  be a monotone and weakly DR-submodular function with parameter  $\gamma$ . For any two vector  $\mathbf{x}, \mathbf{y} \in \mathcal{X}$ , we have*

$$F(\mathbf{y}) - \left(1 + \frac{1}{\gamma^2}\right) F(\mathbf{x}) \leq \frac{1}{\gamma} \langle \nabla F(\mathbf{x}), \mathbf{y} - \mathbf{x} \rangle.$$

The proof of Lemma 3 can be found in the proof of Theorem 4.2 in (Hassani et al., 2017). Now we can prove Theorem 2 in the gradient ascent case.

*Proof.* Let  $\mathbf{x}^* = \arg \max_{\mathbf{x} \in \mathcal{P}} \sum_{t=1}^T f_t(\mathbf{x})$ . We define  $\nabla_t \triangleq \nabla f_t(\mathbf{x}_t)$ . By the definition of  $\mathbf{x}_{t+1}$  and properties of the projection operator for a convex set, we have

$$\|\mathbf{x}_{t+1} - \mathbf{x}^*\|^2 = \|\Pi_{\mathcal{P}}(\mathbf{x}_t + \eta_t \nabla_t) - \mathbf{x}^*\|^2 \leq \|\mathbf{x}_t + \eta_t \nabla_t - \mathbf{x}^*\|^2 \leq \|\mathbf{x}_t - \mathbf{x}^*\|^2 + \eta_t^2 \|\nabla_t\|^2 - 2\eta_t \nabla_t^\top (\mathbf{x}^* - \mathbf{x}_t).$$

Therefore we deduce

$$\begin{aligned}\nabla_t^\top(\mathbf{x}^* - \mathbf{x}_t) &\leq \frac{\|\mathbf{x}_t - \mathbf{x}^*\|^2 - \|\mathbf{x}_{t+1} - \mathbf{x}^*\|^2 + \eta_t^2 \|\nabla_t\|^2}{2\eta_t} \\ &\leq \frac{\|\mathbf{x}_t - \mathbf{x}^*\|^2 - \|\mathbf{x}_{t+1} - \mathbf{x}^*\|^2}{2\eta_t} + \frac{\eta_t G^2}{2}\end{aligned}$$

By Lemma 3, we obtain that

$$f_t(\mathbf{x}^*) - \left(1 + \frac{1}{\gamma^2}\right) f_t(\mathbf{x}_t) \leq \frac{1}{\gamma} \langle \nabla_t, \mathbf{x}^* - \mathbf{x}_t \rangle.$$

If we define  $\frac{1}{\eta_0} \triangleq 0$ , it can be deduced that

$$\begin{aligned}\sum_{t=1}^T \left[ f_t(\mathbf{x}^*) - \left(1 + \frac{1}{\gamma^2}\right) f_t(\mathbf{x}_t) \right] &\leq \frac{1}{\gamma} \sum_{t=1}^T \nabla_t^\top(\mathbf{x}^* - \mathbf{x}_t) \\ &\leq \frac{1}{\gamma} \left[ \frac{1}{2\eta_t} \sum_{t=1}^T \left( \|\mathbf{x}_t - \mathbf{x}^*\|^2 - \|\mathbf{x}_{t+1} - \mathbf{x}^*\|^2 \right) + \frac{G^2}{2} \sum_{t=1}^T \eta_t \right] \\ &\leq \frac{1}{\gamma} \left[ \frac{1}{2} \left( \sum_{t=1}^T \|\mathbf{x}_t - \mathbf{x}^*\|^2 \left( \frac{1}{\eta_t} - \frac{1}{\eta_{t-1}} \right) \right) + \frac{G^2}{2} \sum_{t=1}^T \eta_t \right] \\ &\leq \frac{1}{\gamma} \left[ \frac{D^2}{2\eta_T} + \frac{G^2}{2} \sum_{t=1}^T \eta_t \right] \\ &\leq \frac{3}{2\gamma} DG\sqrt{T}.\end{aligned}$$

After rearrangement, it is clear that

$$\frac{\gamma^2}{\gamma^2 + 1} \sum_{t=1}^T f_t(\mathbf{x}^*) - \sum_{t=1}^T f_t(\mathbf{x}_t) \leq \frac{3\gamma DG\sqrt{T}}{2(\gamma^2 + 1)}.$$

□

## B.2 Stochastic Gradient Ascent Case

*Proof.* The strategy for the stochastic gradient ascent case is similar to that of the gradient ascent case. Again, by the definition of  $\mathbf{x}_{t+1}$ , we have

$$\|\mathbf{x}_{t+1} - \mathbf{x}^*\|^2 = \|\Pi_{\mathcal{P}}(\mathbf{x}_t + \eta_t \mathbf{g}_t) - \mathbf{x}^*\|^2 \leq \|\mathbf{x}_t + \eta_t \mathbf{g}_t - \mathbf{x}^*\|^2 \leq \|\mathbf{x}_t - \mathbf{x}^*\|^2 + \eta_t^2 \|\mathbf{g}_t\|^2 - 2\eta_t \mathbf{g}_t^\top(\mathbf{x}^* - \mathbf{x}_t)$$

Therefore we deduce

$$\mathbf{g}_t^\top(\mathbf{x}^* - \mathbf{x}_t) \leq \frac{\|\mathbf{x}_t - \mathbf{x}^*\|^2 - \|\mathbf{x}_{t+1} - \mathbf{x}^*\|^2 + \eta_t^2 \|\mathbf{g}_t\|^2}{2\eta_t} \leq \frac{\|\mathbf{x}_t - \mathbf{x}^*\|^2 - \|\mathbf{x}_{t+1} - \mathbf{x}^*\|^2}{2\eta_t} + \frac{\eta_t G^2}{2}$$

Similarly, if we define  $\frac{1}{\eta_0} \triangleq 0$  and in light of Lemma 3, it can be deduced that

$$\begin{aligned}
 \sum_{t=1}^T \mathbb{E} \left[ f_t(\mathbf{x}^*) - \left(1 + \frac{1}{\gamma^2}\right) f_t(\mathbf{x}_t) \right] &\leq \frac{1}{\gamma} \sum_{t=1}^T \mathbb{E} [\nabla_t^\top (\mathbf{x}^* - \mathbf{x}_t)] \\
 &= \frac{1}{\gamma} \sum_{t=1}^T \mathbb{E} [\mathbb{E} [\nabla_t^\top (\mathbf{x}^* - \mathbf{x}_t) | \mathbf{x}_t]] \\
 &= \frac{1}{\gamma} \sum_{t=1}^T \mathbb{E} [\mathbb{E} [\mathbf{g}_t^\top (\mathbf{x}^* - \mathbf{x}_t) | \mathbf{x}_t]] \\
 &\leq \frac{1}{\gamma} \left[ \frac{1}{2\eta_t} \sum_{t=1}^T \mathbb{E} [\|\mathbf{x}_t - \mathbf{x}^*\|^2 - \|\mathbf{x}_{t+1} - \mathbf{x}^*\|^2] + \frac{G^2}{2} \sum_{t=1}^T \eta_t \right] \\
 &\leq \frac{1}{\gamma} \left[ \frac{1}{2} \left( \sum_{t=1}^T \mathbb{E} [\|\mathbf{x}_t - \mathbf{x}^*\|^2] \right) \left( \frac{1}{\eta_t} - \frac{1}{\eta_{t-1}} \right) + \frac{G^2}{2} \sum_{t=1}^T \eta_t \right] \\
 &\leq \frac{1}{\gamma} \left[ \frac{D^2}{2\eta_T} + \frac{G^2}{2} \sum_{t=1}^T \eta_t \right] \\
 &\leq \frac{3}{2\gamma} DG\sqrt{T}.
 \end{aligned}$$

After rearrangement, it is clear that

$$\frac{\gamma^2}{\gamma^2 + 1} \sum_{t=1}^T f_t(\mathbf{x}^*) - \sum_{t=1}^T \mathbb{E} [f_t(\mathbf{x}_t)] \leq \frac{3\gamma DG\sqrt{T}}{2(\gamma^2 + 1)}.$$

□
